# Supplementary material for: Methylation and expression of PTPN22 in esophageal squamous cell carcinoma
Source: PubMed Central journal article supplement (PMC5325424; doi:10.18632/oncotarget.11581), 2016-08-24
Supplement: oncotarget-07-64043-s001.pdf [file oncotarget-07-64043-s001.pdf]

## Methylation and expression of PTPN22 in esophageal squamous cell carcinoma

### SUPPLEMENTARY FIGURE

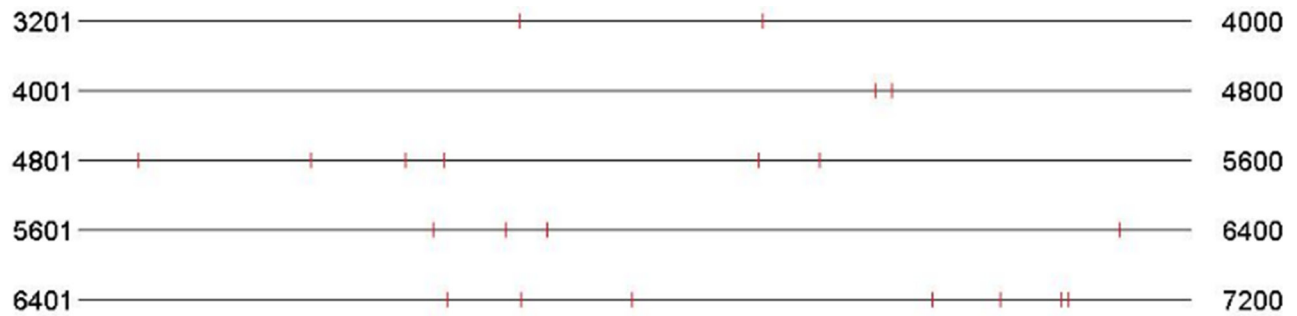

Supplementary Figure S1: Schematic diagram of the CpG sites in PTPN22. The transcriptional start site is located at 5,000bp.
